# Supplementary material
Source: MDPI journal article supplement (https://www.mdpi.com/search?q=ijms-20-01514)
Supplement: s001 [file ijms-20-01514-s001.pdf]

*Research article*

**Analysis of 50 neurodegenerative genes in clinically diagnosed early-onset Alzheimer's disease**

Vo Van Giau<sup>1a</sup>, Vorapun Senanarong<sup>2a</sup>, Eva Bagyinszky<sup>1</sup>, Seong Soo A. An<sup>1+</sup>, SangYun Kim<sup>3+</sup>

<sup>1</sup>Department of Bionano Technology, Gachon University

<sup>2</sup>Department of Medicine at Mahidol University, Thailand

<sup>3</sup>Department of Neurology, Seoul National University College of Medicine & Neurocognitive Behavior Center, Seoul National University Bundang Hospital

**<sup>a</sup>These authors contributed equally.**

**+ Address for co-correspondence:** Seong Soo A. An, PhD and SangYun Kim, MD, PhD

Seong Soo A. An, PhD

Department of Bionano Technology, Gachon Bionano Research Institute, Gachon University,  
1342 Sunnam-daero, Sujung-gu, Seongnam-si, Gyeonggi-do,

461-701, South Korea

Tel: +82-31-750-8755

Fax: +82-31-750-8755

E-mail: [seong.an@gmail.com](mailto:seong.an@gmail.com)

SangYun Kim, MD, PhD

Department of Neurology, Seoul National University Bundang Hospital, Seoul National  
University College of Medicine, 300 Gumidong, Bundang-gu, Seongnam-si, Gyeonggi-do,

463-707, South Korea

Tel:+82-31-787-7462

Fax: +82-31-719-6815

E-mail: [neuroksy@snu.ac.kr](mailto:neuroksy@snu.ac.kr)

**Table S1. Missense mutation implicated in EOAD identified by NGS genetic analysis of 08 cases**

(B: Benign; D: Damaging; T: Tolerant; N: Neutral; NA: Not Available)

| No. | Gene symbol   | Protein change | SNP-ID    | Frequency   |                    |        |              | In silico prediction |            |            | Clinical interpretation AD mutation database   |
|-----|---------------|----------------|-----------|-------------|--------------------|--------|--------------|----------------------|------------|------------|------------------------------------------------|
|     |               |                |           | #ID Patient | 622 normal control | ExAC   | 1000 Genomes | PolyPhen2 HumDiv     | Sift score | Provean    |                                                |
| 1   | <i>APP</i>    | p.V604M        | NA        | 6           | NA                 | NA     | NA           | 0.474 (D)            | 0.095 (T)  | -0.72 (N)  | <i>May be involved in disease phenotypes</i>   |
| 2   | <i>PSEN1</i>  | p.E184G        | NA        | 7           | NA                 | NA     | NA           | 0.73 (D)             | 0.005 (D)  | -8.99 (D)  | <i>Known AD-causative mutation</i>             |
| 3   | <i>CRI</i>    | p.H1658R       | rs2274567 | 2, 3, 4 & 7 | 0.204180           | 0.2510 | 0.234        | 0.98 (D)             | 0.89 (T)   | -1.81 (N)  | <i>Possible risk factor for AD</i>             |
|     |               | p.T1858M       | rs3737002 | 1, 2, 4, 8  | 0.425241           | 0.2750 | 0.069        | 0.995 (D)            | 0.019 (D)  | -0.83 (N)  | <i>Common variant, possible AD risk factor</i> |
|     |               | p.T2060S       | rs4844609 | 8/8         | 1                  | 0.9853 | 0.99         | 0.95 (D)             | 0.019 (D)  | 0.55 (N)   | <i>Common variant, possible AD risk factor</i> |
|     |               | p.I2065V       | rs6691117 | 2, 4, 5, 7  | 0.2202             | 0.3341 | 0.354        | 0.005 (B)            | 1 (T)      | 0.49 (N)   | <i>Common variant, possible AD risk factor</i> |
|     |               | p.P2277R       | rs3811381 | 2, 4, 5     | 0.191318           | 0.2403 | 0.145        | 0.032 (B)            | 0.44 (T)   | -0.61 (N)  | <i>Unknown significance</i>                    |
|     |               | p.T2419A       | rs2296160 | 1,2,4,5,8   | 0.664791           | 0.8159 | 0.8431       | 0.001 (B)            | 0.98 (T)   | -0.10 (N)  | <i>Common variant</i>                          |
| 4   | <i>TREM2</i>  | p.L211P        | rs2234256 | 2           | NA                 | 0.01   | 0.03         | 0 (B)                | 0.131 (T)  | -1.145 (N) | <i>Common variant, possible AD risk factor</i> |
| 5   | <i>CTNNA3</i> | p.H150R        | NA        | 5           | NA                 | NA     | NA           | 0.93 (D)             | 0.016 (T)  | -2.145 (D) | <i>May be AD risk factor</i>                   |

|    |              |              |                 |             |          |         |         |              |              |              |                                                 |
|----|--------------|--------------|-----------------|-------------|----------|---------|---------|--------------|--------------|--------------|-------------------------------------------------|
|    |              | p.S596N      | rs4548513       | 8/8         | 0.431672 | 0.4120  | 0.5120  | 0.001<br>(B) | 1<br>(T)     | 2.04<br>(N)  | <i>Possible risk factor for LOAD and autism</i> |
| 6  | <i>DNMBP</i> | p.N373K      | rs35924554      | 1           | 0.01     | 0.09    | 0.05    | 0.2<br>(B)   | 0.721<br>(T) | 1.04<br>(N)  | <i>Unknown significance</i>                     |
|    |              | p.R1137<br>Q | rs11629667<br>6 | 5           | 0.0040   | 0.0006  | 0.00005 | 0.99<br>(D)  | 0.006<br>(T) | -2.58<br>(D) | <i>Unknown significance</i>                     |
|    |              | p.C1413W     | rs11190305      | 1, 2, 4     | 0.261254 | 0.3442  | 0.288   | 0.094<br>(B) | 0.18<br>(T)  | -1.61<br>(N) | <i>Common variant</i>                           |
|    |              | p.P1424<br>L | rs11357665<br>1 | 6           | NA       | 0.0004  | 0.0002  | 0.0<br>(B)   | 0.721<br>(T) | 1.61<br>(N)  | <i>Unknown significance</i>                     |
| 7  | <i>SORL1</i> | p.A528T      | rs2298813       | 1,3,4       | 0.17283  | 0.0721  | 0.08    | 0.59<br>(B)  | 0.3<br>(T)   | 0.12<br>(N)  | <i>AD risk factor</i>                           |
|    |              | p.Q1074<br>E | rs1699107       | 8/8         | 0.46     | 0.854   | 0.98    | 0.39<br>(B)  | 0.45<br>(T)  | 1.12<br>(N)  | <i>Common variant, unknown significance</i>     |
|    |              | p.V1967<br>I | rs1792120       | 8/8         | 0.998392 | 0.9953  | 0.98    | 0.003<br>(B) | 1<br>(T)     | 0.12<br>(N)  | <i>Common, unknown</i>                          |
| 8  | <i>BACE1</i> | p.C481R      | rs74642146      | 8/8         | 1.0      | 0.99    | 0.9     | 0<br>(B)     | 0.4<br>(T)   | 0.42<br>(N)  | <i>Common mutation</i>                          |
| 9  | <i>LRP6</i>  | p.V1062I     | rs2302685       | 8/8         | 0.922830 | 0.8474  | 0.874   | 0<br>(B)     | 1<br>(T)     | 0.96<br>(N)  | <i>Possible AD risk factor</i>                  |
| 10 | <i>ABCA7</i> | p.E188G      | rs3764645       | 1,2,4,5,6,8 | 0.428457 | 0.4838  | 0.415   | 0.06<br>(B)  | 0.67<br>(T)  | -0.87<br>(N) | <i>Unknown</i>                                  |
|    |              | p.G398D      | NA              | 6           | NA       | NA      | NA      | 0.8<br>(D)   | 0.25<br>(T)  | -2.89<br>(D) | <i>unknown</i>                                  |
|    |              | p.R463H      | rs3752233       | 7           | 0.163183 | 0.04775 | 0.05    | 0.8<br>(D)   | 0.25<br>(T)  | -2.89<br>(D) | <i>unknown</i>                                  |
|    |              | p.N718T      | rs3752239       | 3, 5, 7     | 0.1543   | 0.070   | 0.05    | 0.58         | 0.24         | -5.17        | <i>unknown</i>                                  |

|    |              |          |                 |                   |          |          |        |              |              |              |                                                             |
|----|--------------|----------|-----------------|-------------------|----------|----------|--------|--------------|--------------|--------------|-------------------------------------------------------------|
|    |              |          |                 |                   |          |          |        | (D)          | (T)          | (D)          |                                                             |
|    |              | p.D964E  | rs11739071<br>5 | 3                 | 0.0080   | 0.001506 | 0.0027 | 1<br>(D)     | 0<br>(D)     | -3.61<br>(D) | <i>Unknown</i>                                              |
|    |              | p.R1349Q | rs3745842       | 6, 8              | 0.3665   | 0.4433   | 0.5433 | 0.004<br>(B) | 0.54<br>(T)  | 0.05<br>(N)  | Common variant, unknown                                     |
|    |              | p.G1527H | rs3752246       | 1,2,3,4,5,7,<br>8 | 0.12     | 0.25     | 0.321  | 0.004<br>(B) | 0.54<br>(T)  | 0.1<br>(N)   | <i>AD risk factor</i>                                       |
|    |              | p.Q1686R | rs4147918       | 3                 | 0.1503   | 0.047    | 0.05   | 0.004<br>(B) | 0.23<br>(T)  | -0.44<br>(N) | <i>AD risk factor</i>                                       |
|    |              | p.A2045S | rs4147934       | 1,2,4,6,7,8       | 0.4220   | 0.7317   | 0.63   | 0.051<br>(B) | 0.96<br>(T)  | 0.06<br>(N)  | <i>Putative AD risk factor</i>                              |
|    |              | p.F2071C | NA              | 3                 | 0.0064   | 0.0025   | 0.003  | 0.5<br>(B)   | 0.46<br>(T)  | -6.84<br>(D) | <i>Common mutation,<br/>unknown</i>                         |
| 11 | <i>CD33</i>  | p.A14V   | rs12459419      | 2, 5, 8           | 0.174437 | 0.2939   | 0.23   | 0.023<br>(B) | 0.08<br>(T)  | -2.12<br>(N) | <i>AD risk factor</i>                                       |
|    |              | p.R69G   | rs2455069       | 6                 | 0.058682 | 0.3577   | 0.34   | 0.009<br>(B) | 0.33<br>(T)  | -2.36<br>(N) | <i>Unknown</i>                                              |
|    |              | p.R98K   | rs14811823<br>9 | 6                 | 0.0001   | 0.004    | 0.0003 | 0.003<br>(B) | 1<br>(T)     | 3.06<br>(N)  | <i>unknown</i>                                              |
| 12 | <i>PINK1</i> | p.Y253D  | NA              | 6                 | NA       | NA       | NA     | 0.18<br>(B)  | 0.165<br>(T) | 2.36<br>(N)  | <i>unknown</i>                                              |
|    |              | p.A340P  | rs3738136       | 1, 6              | 0.3054   | 0.09211  | 0.092  | 0.605<br>(D) | 0.05<br>(D)  | -3.91<br>(D) | May be risk factor for<br>progressive supranuclear<br>palsy |
|    |              | p.N521T  | rs1043424       | 1, 6              | 0.377010 | 0.09211  | 0.2811 | 0.005<br>(B) | 0.24<br>(T)  | -0.94<br>(N) | Unclear significance                                        |

|    |                |          |            |                     |          |         |        |              |              |              |                                                           |
|----|----------------|----------|------------|---------------------|----------|---------|--------|--------------|--------------|--------------|-----------------------------------------------------------|
| 13 | <i>PARK2</i>   | p.S167N  | rs1801474  | 1, 3, 4, 5, 7       | 0.456592 | 0.06758 | 0.146  | 0.03<br>(B)  | 0.31<br>(T)  | -1.45<br>(N) | <i>Benign variant</i>                                     |
|    |                | p.V380L  | rs1801582  | 6, 8                | 0.044212 | 0.1646  | 0.145  | 0<br>(B)     | 0.37<br>(T)  | -0.09<br>(N) | <i>Benign variant</i>                                     |
| 14 | <i>LRRK2</i>   | p.R50H   | rs2256408  | 8/8                 | 1.000000 | 0.9911  | 0.97   | 0<br>(B)     | 1<br>(T)     | 0.94<br>(N)  | <i>Common variant, putative PD risk factor</i>            |
|    |                | p.N551K  | rs7308720  | 4                   | 0.152733 | 0.08607 | 0.102  | 0.972<br>(D) | 0.005<br>(D) | -2.63<br>(D) | <i>Putative PD risk factor</i>                            |
|    |                | p.R1398Q | rs7133914  | 8                   | 0.136656 | 0.08412 | 0.0953 | 0.58<br>(D)  | 0.1<br>(T)   | -1.19<br>(N) | <i>Putative PD risk factor/putative protective effect</i> |
|    |                | p.R1628P | rs33949390 | 8                   | NA       | NA      | 0.0005 | 0.899<br>(D) | 0.04<br>(D)  | -3.63<br>(D) | <i>PD risk factor</i>                                     |
|    |                | p.S1647T | rs11564148 | 1, 2, 3, 6, 7, 8    | 0.260450 | 0.2983  | 0.2754 | 0.29<br>(B)  | 0.081<br>(T) | -0.15<br>(N) | <i>Possible PD risk factor</i>                            |
|    |                | p.N2081D | rs33995883 | 2                   | NA       | 0.0009  | 0.0008 | 0<br>(B)     | 0.95<br>(T)  | -0.15<br>(N) | <i>Common variant, may not be significant</i>             |
|    |                | p.M2397T | rs3761863  | 1, 2, 3, 4, 6, 7, 8 | 0.418810 | 0.6240  | 0.548  | 0<br>(B)     | 0.466<br>(T) | -0.53<br>(N) | <i>Possible PD risk factor</i>                            |
| 15 | <i>SIGMAR1</i> | p.Q2P    | rs1800866  | 1,3,5,8             | 0.319936 | 0.1840  | 0.195  | 0<br>(B)     | 0.343<br>(T) | 0.03<br>(N)  | <i>Possible risk factor</i>                               |
| 16 | <i>MAPT</i>    | p.P513A  | NA         | 2                   | NA       | NA      | NA     | 0.4<br>(B)   | 0.053<br>(T) | -0.53<br>(N) | <i>Unknown</i>                                            |
| 17 | <i>ALS2</i>    | p.V368M  | NA         | 8/8                 | 1.000000 | 0.9106  | 0.89   | 0.009<br>(B) | 0.191<br>(T) | -0.06<br>(N) | <i>Common mutation, unknown</i>                           |
| 18 | <i>FIG4</i>    | p.M364L  | rs2295837  | 2                   | 0.221061 | 0.0742  | 0.098  | 0.001<br>(B) | 1<br>(T)     | 1.11<br>(N)  | <i>Benign mutation</i>                                    |

|    |        |          |                 |             |          |          |         |       |       |       |                                                         |
|----|--------|----------|-----------------|-------------|----------|----------|---------|-------|-------|-------|---------------------------------------------------------|
|    |        | p.V654A  | rs9885672       | 2,3,5,6,8   | 0.354502 | 0.2753   | 0.069   | 0     | 0.3   | 0.95  | <i>Benign mutation</i>                                  |
| 19 | OPTN   | p.M98K   | rs11258194      | 3,7,8       | 0.080    | 0.0451   | 0.0678  | 0.04  | 0.92  | -0.06 | <i>Involved in glaucoma</i>                             |
|    |        | p.E316K  | NA              | 8/8         | NA       | NA       | NA      | 0.127 | 0.025 | -1.06 | <i>Common variant, may not be significant</i>           |
| 20 | SPG11  | p.N278S  | NA              | 7           | 0.07479  | 0.00779  | 0.003   | 0.01  | 0.45  | -0.85 | <i>unknown</i>                                          |
|    |        | p.F463S  | rs3759871       | 1,2,3,6,8   | 0.4791   | 0.4657   | 0.496   | 0.009 | 0.341 | -1.27 | <i>Unknown</i>                                          |
|    |        | p.I1250T | NA              | 1           | NA       | NA       | NA      | 0.001 | 0.06  | 1.2   | <i>unknown</i>                                          |
| 21 | CSF1R  | p.P54Q   | NA              | 4           | 0.2901   | 0.00009  | 0.00008 | 0.15  | 0.06  | -3.36 | <i>Novel mutation, may be risk factor for AD</i>        |
|    |        | p.H362R  | s10079250       | 1,2,3,4,7,8 | 0.29019  | 0.00009  | 0.067   | 0.15  | 0.06  | -3.36 | <i>Common mutation, possible cancer risk factor</i>     |
|    |        | p.L536V  | rs55942044      | 6           | NA       | NA       | NA      | 0.101 | 1.00  | 4.27  | <i>Probable novel variant, predicted to be damaging</i> |
| 22 | NOTCH3 | p.R1175W | rs20050406<br>0 | 8           | 0.012058 | 0.001047 | 0.0024  | 0.91  | 0.004 | -5.05 | <i>unknown</i>                                          |
|    |        | p.A2223V | rs1044009       | 8/8         | 0.590032 | 0.7591   | 0.6546  | 0.003 | 0.14  | -1.46 | <i>Common variant, unknown significance</i>             |
| 23 | PRNP   | p.M129V  | rs1799990       | 7           | 0.024920 | 0.3078   | 0.26373 | 0.012 | 0.024 | -0.66 | <i>Pathogenic nature complicated</i>                    |
|    |        | p.E219K  | rs1800014       | 6           | 0.057074 | 0.008728 | 0.009   | 0.003 | 0.035 | 0.00  | <i>Pathogenic nature complicated</i>                    |
